# Supplementary material for: Rotor-like ZnO by epitaxial growth under hydrothermal conditionsElectronic supplementary information (ESI) available: TEM images of the rod-like and rotor-like ZnO in the bright field and dark field. See http://www.rsc.org/suppdata/cc/b4/b403252g/
Source: Royal Society of Chemistry journal article supplement (doi:10.1039/b403252g), 2004-01-01
Supplement: b403252g.pdf [file b403252g.pdf]

### Rotor-like ZnO by epitaxial growth under hydrothermal conditions

X. P. Gao,<sup>\*a</sup> Z. F. Zheng,<sup>a</sup> H. Y. Zhu,<sup>b</sup> G. L. Pan,<sup>a</sup> J. L. Bao,<sup>a</sup> F. Wu,<sup>a, c</sup> and D. Y. Song<sup>a</sup>

<sup>a</sup> Institute of New Energy Material Chemistry, Nankai University, Tianjin 300071, China.  
Fax: 86-22-23502604; Tel: 86-22-23500876; E-mail: [xpgao@nankai.edu.cn](mailto:xpgao@nankai.edu.cn)

<sup>b</sup> Electron Microscope Unit and School of Chemistry, The University of Sydney, NSW 2006, Australia Fax: 61 2 9351 7682; Email: [h.zhu@emu.usyd.edu.au](mailto:h.zhu@emu.usyd.edu.au)

<sup>c</sup> School of Chemical Engineering and Environmental, Beijing Institute of Technology, Beijing 100081, China

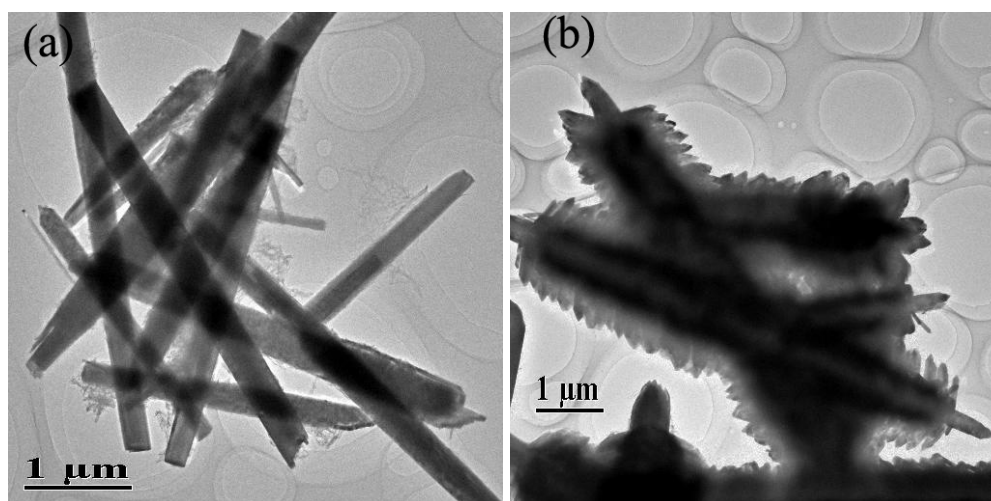

Fig. S1 Bright field TEM images of the rod-like (a) and rotor-like ZnO (b).

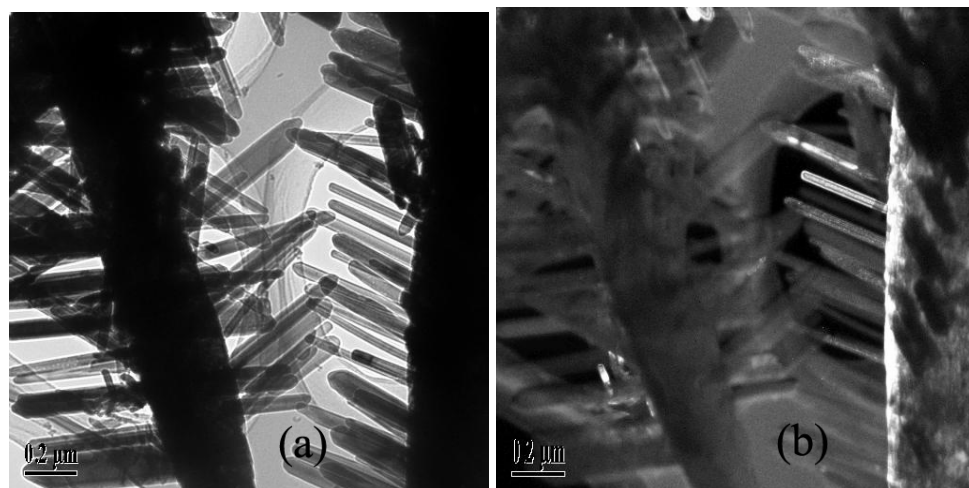

Fig.S2 TEM images of the rotor-like ZnO in the bright field (a) and dark field (b)

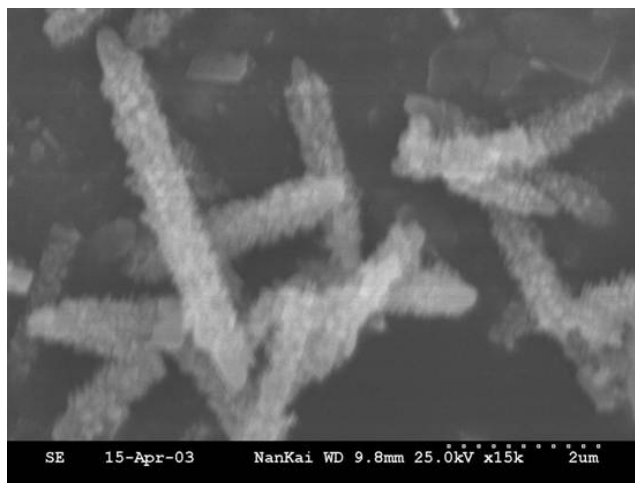

Fig.S3 SEM image of the rod-like ZnO mixed with  $\text{Zn}(\text{OH})_4^{2-}$  solution before the hydrothermal reaction, indicating the fast nucleation on the rod-like ZnO occurs prior to the hydrothermal reaction.
